# Supplementary material
Source: Research Square preprint supplement (doi:10.21203/rs.3.rs-9153262/v1)
Supplement: Supplementary file 1 [file 927f61c862ffe44d186c5621.docx]

**Highlights**

- GIS-AHP framework for regional‑scale screening of dimension stone quarries
- Integration of geological and non‑geological constraints for early exploration decisions
- High‑suitability zones concentrated within a limited number of administrative units
- Suitability‑density metrics enhance the governance relevance of regional screening maps
